# Supplementary material for: Convergent evolution of monocyte differentiation in adult skin instructs Langerhans cell identity
Source: PubMed Central journal article supplement (PMC7616733; doi:10.1126/sciimmunol.adp0344), 2024-09-06
Supplement: EMS199473-supplement-Fig_S1_8.pdf [file EMS199473-supplement-Fig_S1_8.pdf]

## Supplemental Information

### Convergent evolution of monocyte differentiation in adult skin instructs Langerhans cell identity

Anna Appios, James Davies, Sofia Sirvent, Stephen Henderson, Sébastien Trzebanski, Johannes Schroth, Morven L. Law, Inês Boal Carvalho, Marlene Magalhaes Pinto, Cyril Carvalho, Howard Yuan-Hao Kan, Shreya Lovlekar, Christina Major, Andres Vallejo, Nigel J. Hall, Michael Ardern-Jones, Zhaoyuan Liu, Florent Ginhoux, Sian M. Henson, Rebecca Gentek, Elaine Emmerson, Steffen Jung, Marta E. Polak and Clare L. Bennett.

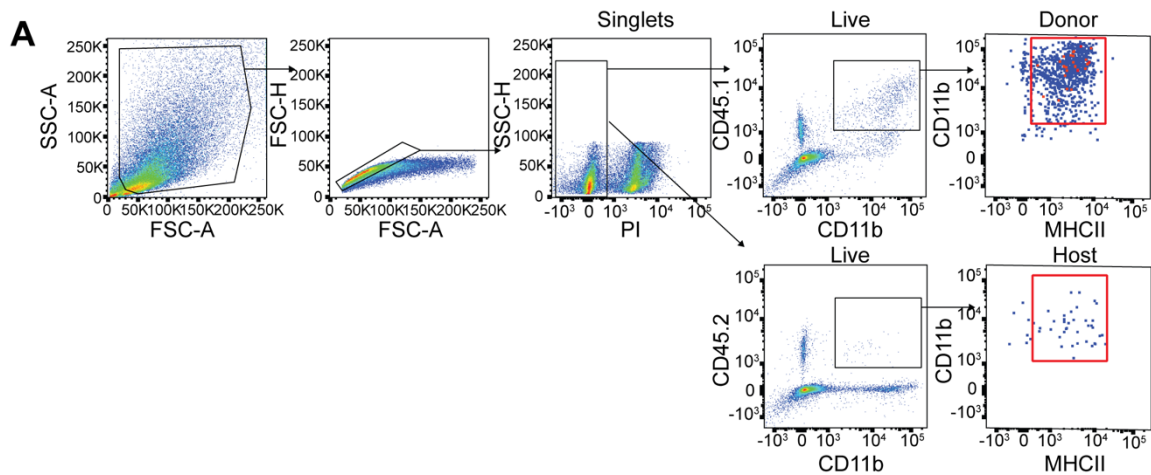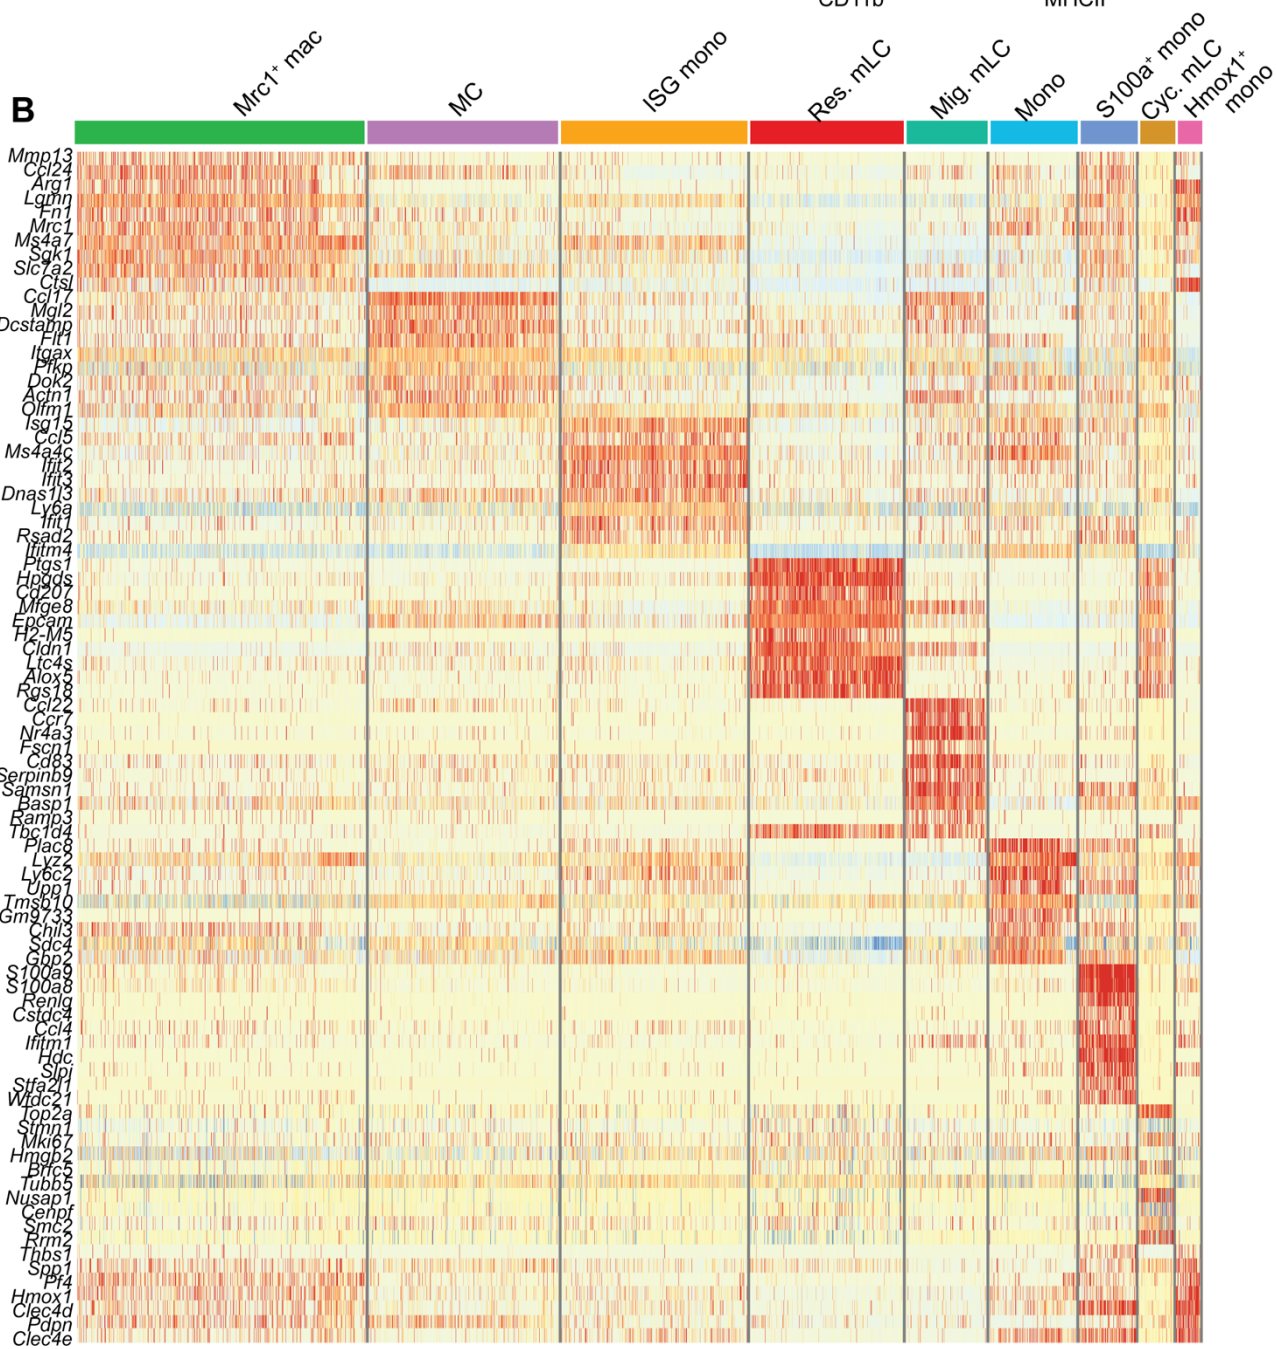

**Figure S1. scRNA-seq of monocyte-derived cells isolated from the epidermis 3 weeks post-BMT with T cells, related to Figure 1. A.** Gating strategy for FACS isolation of donor and host CD11b<sup>+</sup>MHCII<sup>+</sup> cells from murine GVHD epidermis for 10X scRNA-seq. **B.** Heatmap showing differentially expressed genes across clusters from dataset in figure 1B.

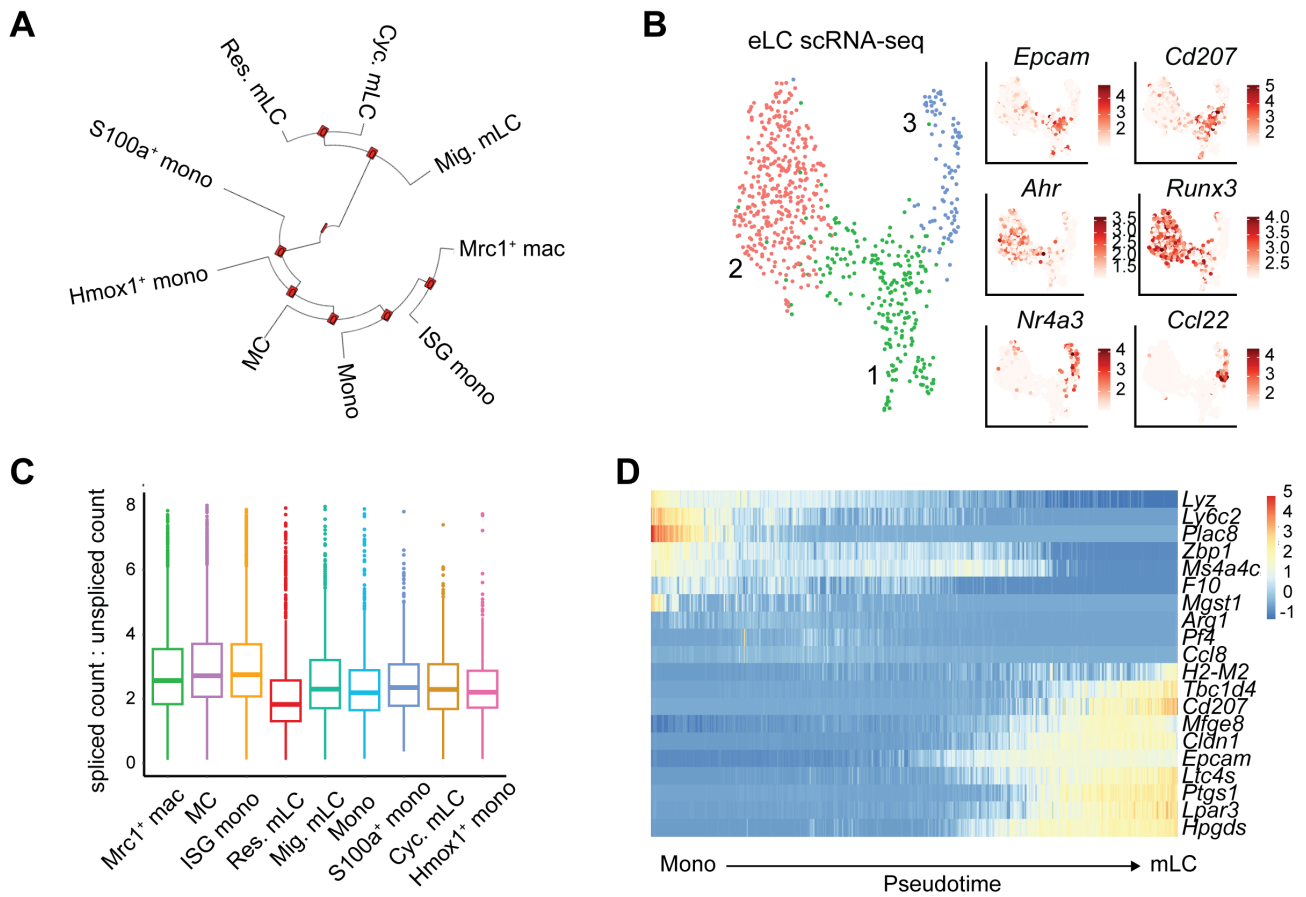

**Figure S2. Analysis of scRNA-seq data from epidermal myeloid cells, related to Figure 1. A.** Parametric bootstrap showing single cell significance of hierarchical clustering identified in Figure 1B. **B.** UMAP and clustering of host LC (left) and heatmap overlays showing expression of indicated genes (right). **C.** Boxplot showing ratio of spliced to unspliced counts across indicated clusters. **D.** Heatmap showing the change in expression of indicated genes across pseudotime from monocyte to mLC differentiation.

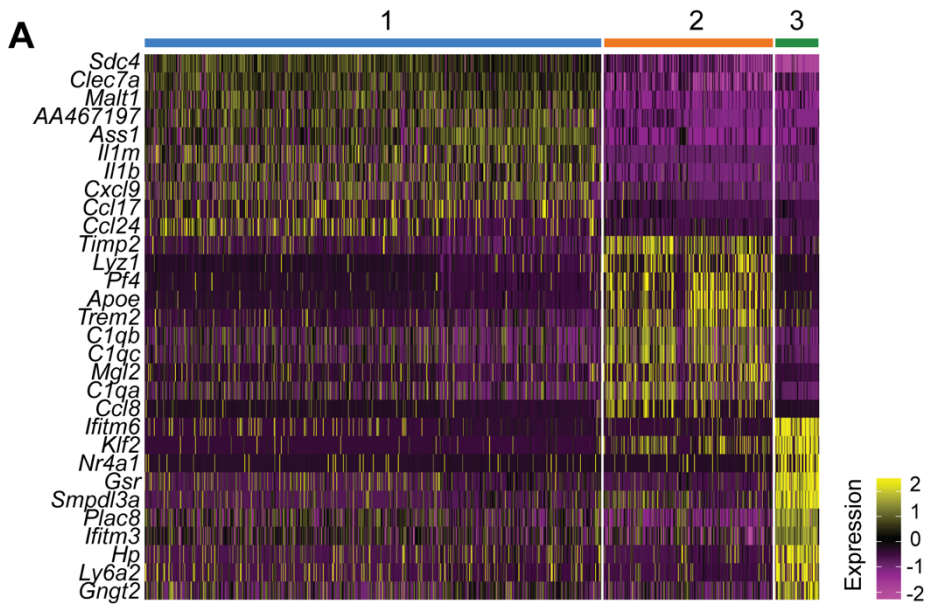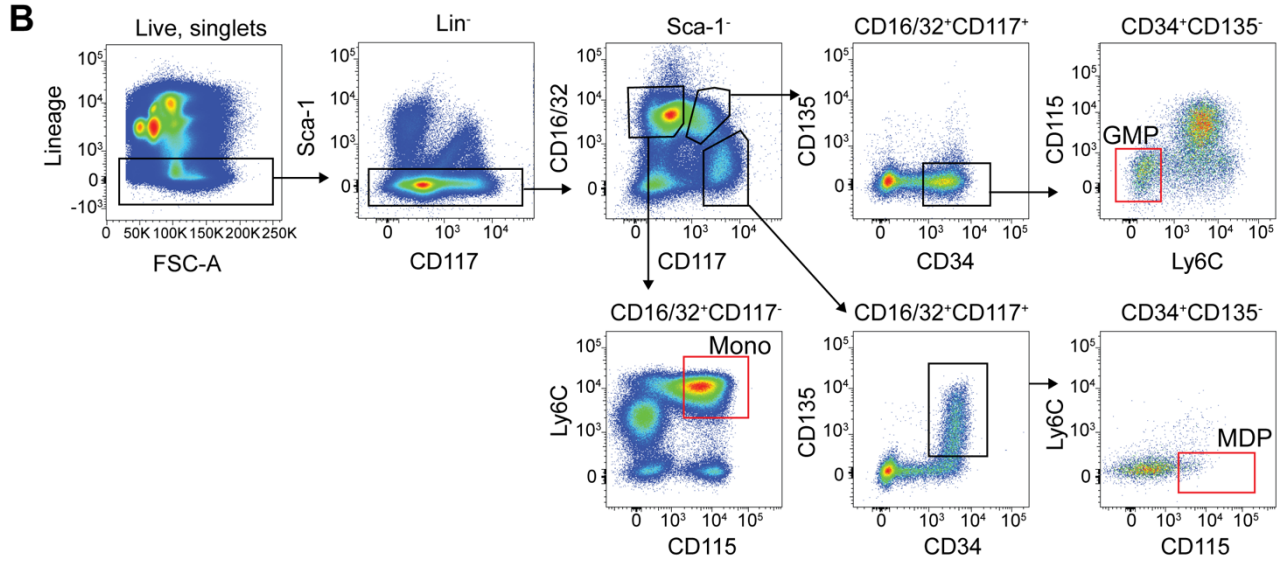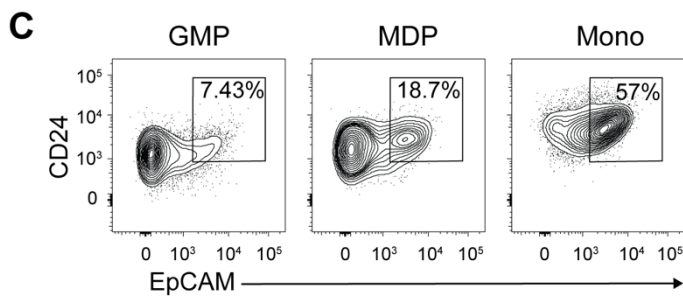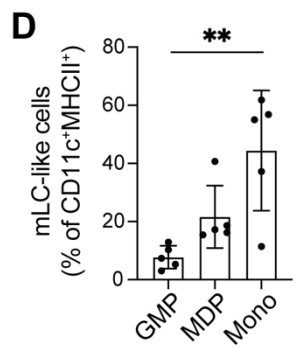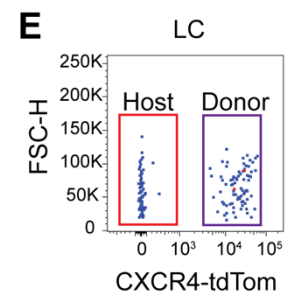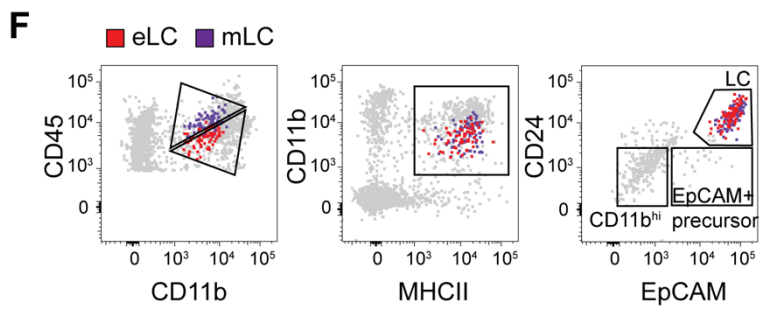

**Figure S3. Analysis of monocyte heterogeneity and differentiation to mLCs, related to Figure 2.** **A.** Heatmap showing scaled expression of differentially expressed genes between monocyte sub-clusters. **B.** Representative FACS gating strategy for GMP, MDP and monocyte isolation (red gates) from murine bone marrow for subsequent culture. **C.** Representative flow plots showing GMP (left), MDP (middle) and monocytes (Mono, right) that were cultured for 6 days in the presence of GM-CSF, TGF $\beta$  and IL34. Gated on live, singlets, CD45<sup>+</sup> cells. **D.** Bar graph showing the frequency of mLC-like cells (CD24<sup>+</sup>EpCAM<sup>+</sup>) as identified in (C). Data are represented as mean $\pm$ SD (n=4 independent experiments). Statistical differences were assessed using a Friedman test, \*\* p<0.01. **E.** Representative flow plot showing host (CXCR4-tdTom<sup>neg</sup>) and donor (CXCR4-tdTom<sup>+</sup>) LC identified in murine epidermis following BMT+T cells using CXCR4-tdTom donor bone marrow. In these transplants all HSC-derived donor cells will be labelled with tdTom. **F.** Cells from (E) overlaid onto the LC-defining gating strategy to show separation of CD45<sup>++</sup> (mLC, donor) and CD45<sup>+</sup> (eLC, host) LC. **G.** Representative flow plots showing donor (left) and host (right) LC identified from murine epidermis following BMT+T cells using Ms4a3<sup>Cre/+</sup>R26LSL-TdTomato.Cx3cr1<sup>GFP/+</sup> bone marrow.

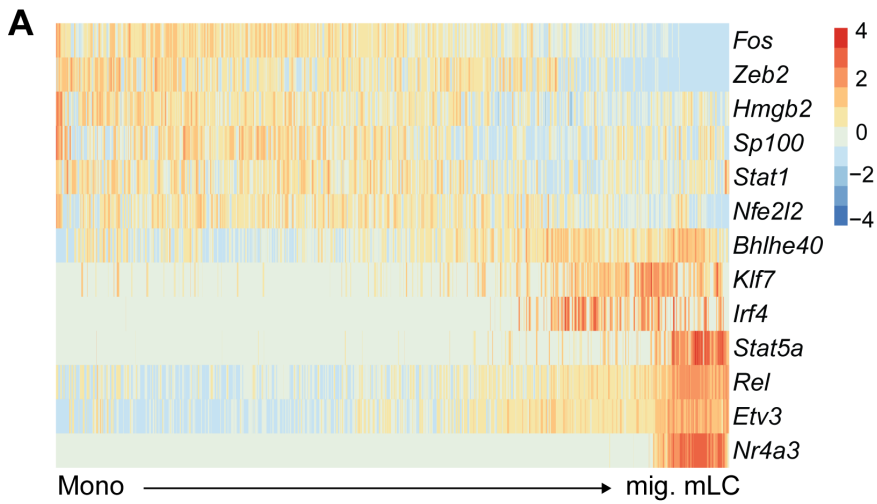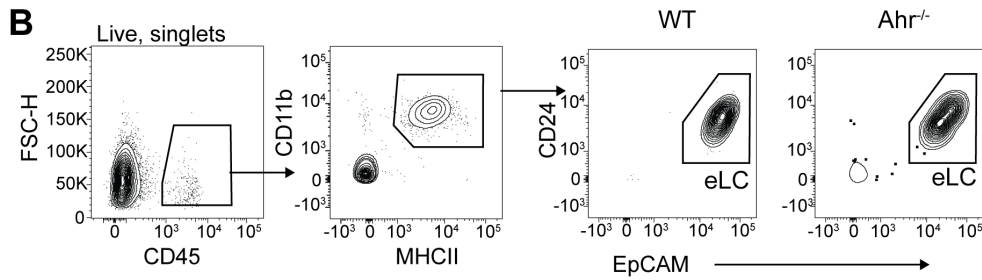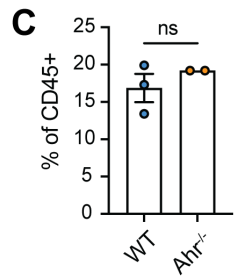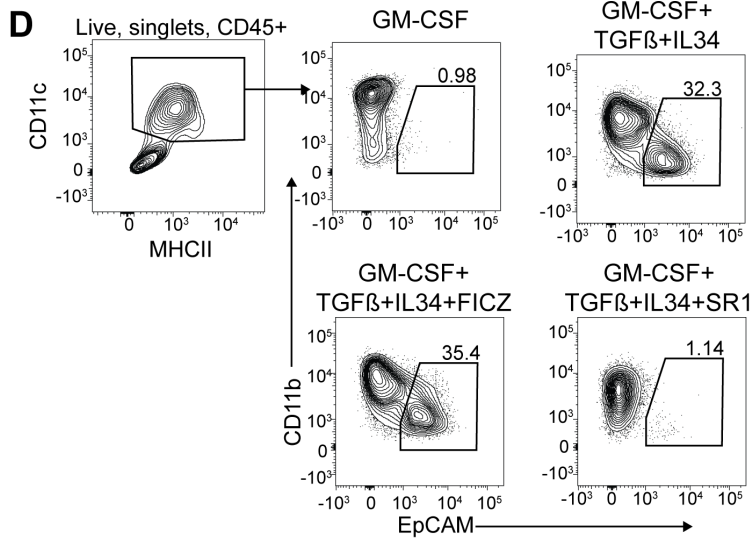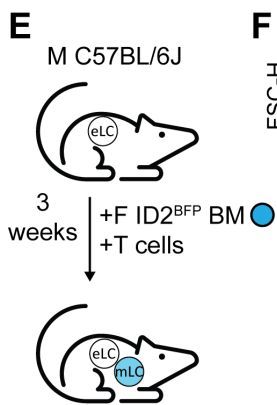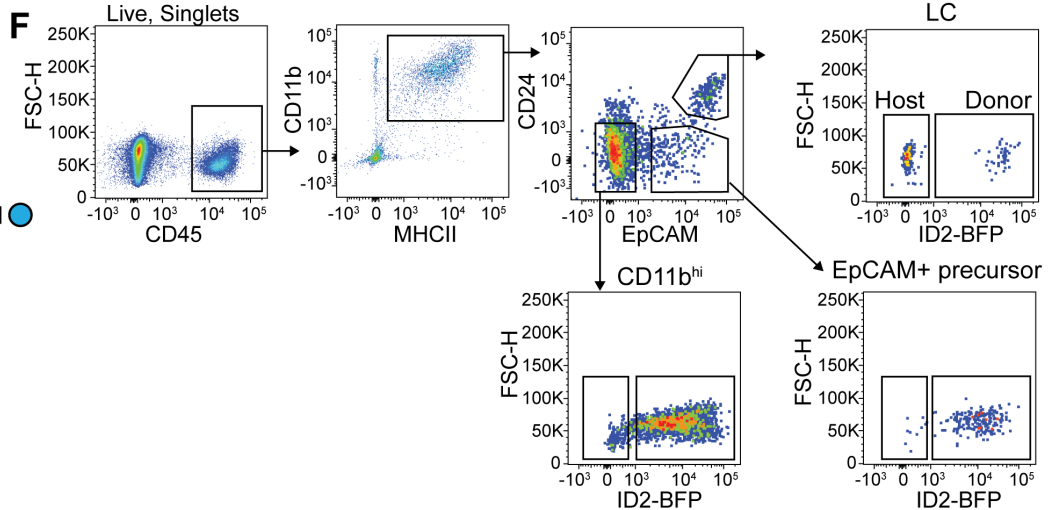

**Figure S4. Transcription factors associated with mLC differentiation, related to Figure 3. A.** Heatmap showing scaled gene expression of transcription factors that are differentially expressed along the differentiation trajectory (Pseudotime) from monocyte to mig. mLC. **B.** Gating strategy and representative flow plots showing LC from WT and *Ahr*<sup>-/-</sup> murine epidermis. **C.** Bar graph showing frequency of LC from WT and *Ahr*<sup>-/-</sup> epidermis. Data are represented as mean±SD (n=3 for WT, 2 for *Ahr*<sup>-/-</sup>). Statistical significance was assessed using a Mann-Whitney test. **D.** Gating strategy and representative flow plots showing mLC-like cells generated under indicated conditions. **E.** Diagram of experimental set up to track in vivo mLC differentiation following GVHD. Irradiated male B6 mice receive female ID2<sup>BFP</sup> bone marrow, CD4 T cells with Matahari T cells and LC chimerism is assessed by flow cytometry 3 weeks later. **F.** Representative gating strategy used to track in vivo mLC differentiation using ID2<sup>BFP</sup> reporter bone marrow.



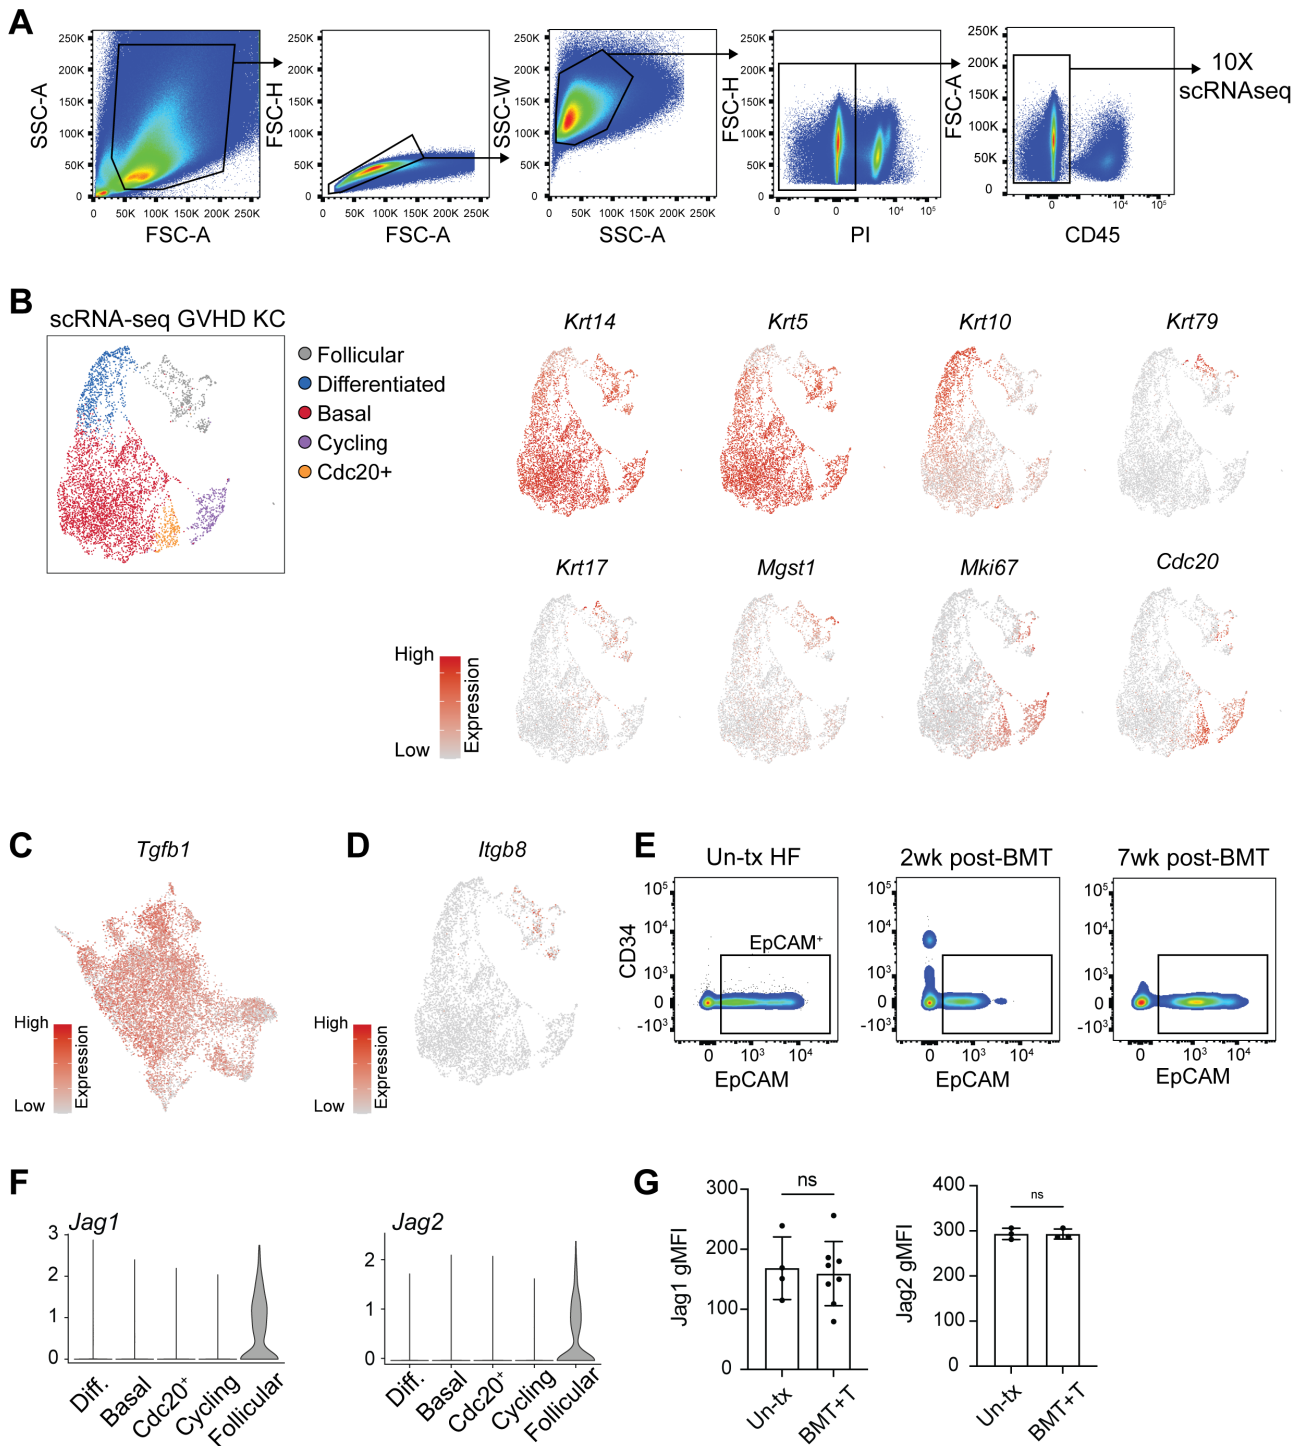

**Figure S5. scRNA-seq of keratinocytes from the GVHD epidermis, related to Figure 4. A.** Gating strategy for FACS isolation of keratinocytes from the GVHD epidermis for 10X scRNA-seq. **B.** UMAP visualisation and clustering of keratinocytes from GVHD epidermis analysed by scRNA-seq (left) and heatmap overlays showing expression of indicated genes across dataset (right). KC, keratinocytes. Expression scales: *Krt14* 0-6, *Krt5* 0-5, *Krt10* 0-6, *Krt79* 0-5, *Krt17* 0-6, *Mgst1* 0-5, *Mki67* 0-4, *Cdc20* 0-3. **C.** Heatmap overlay showing normalized expression of *Tgfb1* overlaid onto UMAP from figure 1B (CD11b<sup>+</sup>MHCII<sup>+</sup> cells from GVHD epidermis). Expression scales: *Tgfb1* 0-3, *Itgb8* 0-2. **D.** Heatmap overlay showing normalized expression of *Itgb8* overlaid onto UMAP from (B). **E.** Representative flow plots showing EpCAM expression on hair follicle cells from untransplanted (Un-tx) and BMT+T epidermis. Gated on live, singlets, CD45<sup>neg</sup>, Sca1<sup>neg</sup> cells. **F.** Violin plots showing normalized expression of indicated genes across scRNA-seq clusters. Diff, differentiated. **G.** Bar graphs showing gMFI of Jag1 (left) and Jag2 (right) by EpCAM<sup>+</sup> HF cells. Data are represented as

mean±SD (for Jag1, n=4 for Un-tx, n=8 for BMT+T cells. For Jag2, n=3 for each group). Statistical differences were assessed using a Mann-Whitney test.

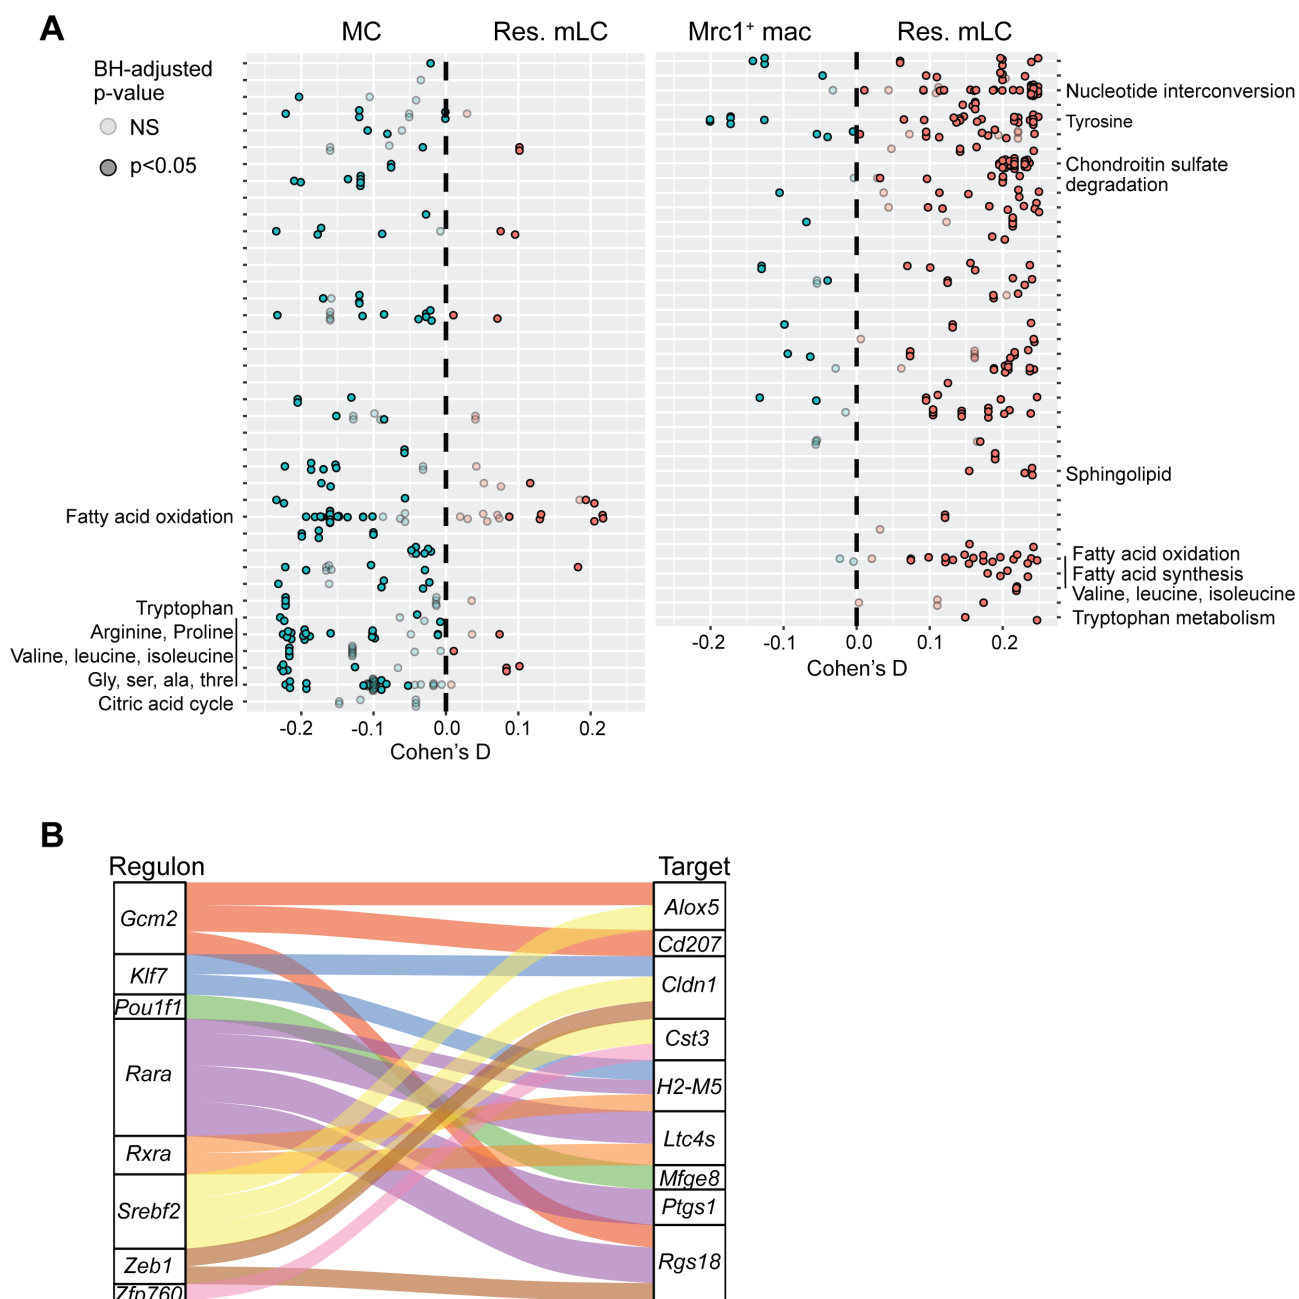

**Figure S6. Metabolic adaptation of resident mLC, related to Figure 5. A.** Differential activity of metabolic reactions between MC and res. mLC (left) and Mrc1<sup>+</sup> mac and res. mLC (right) analysed using COMPASS. Reactions (dots) are coloured by the sign of their Cohen's D statistic, bright dots P<0.05. **B.** Relationship between 8/10 of the most enriched res. mLC regulons identified by SCENIC (Regulon; left) and 9/10 of the res. mLC signature genes shown in Fig S1B (Target; right).

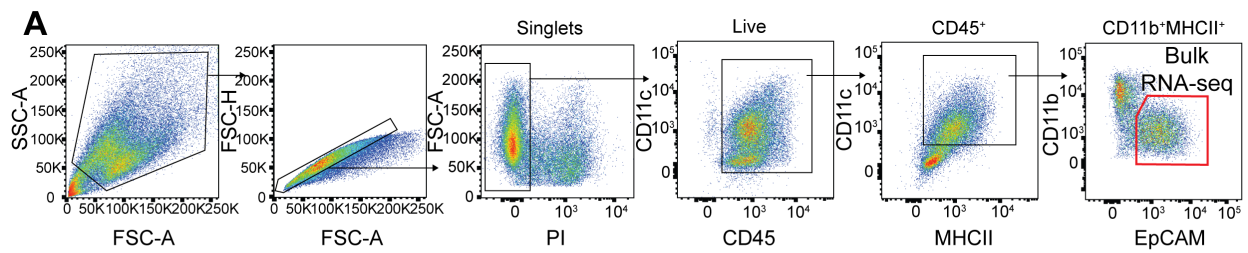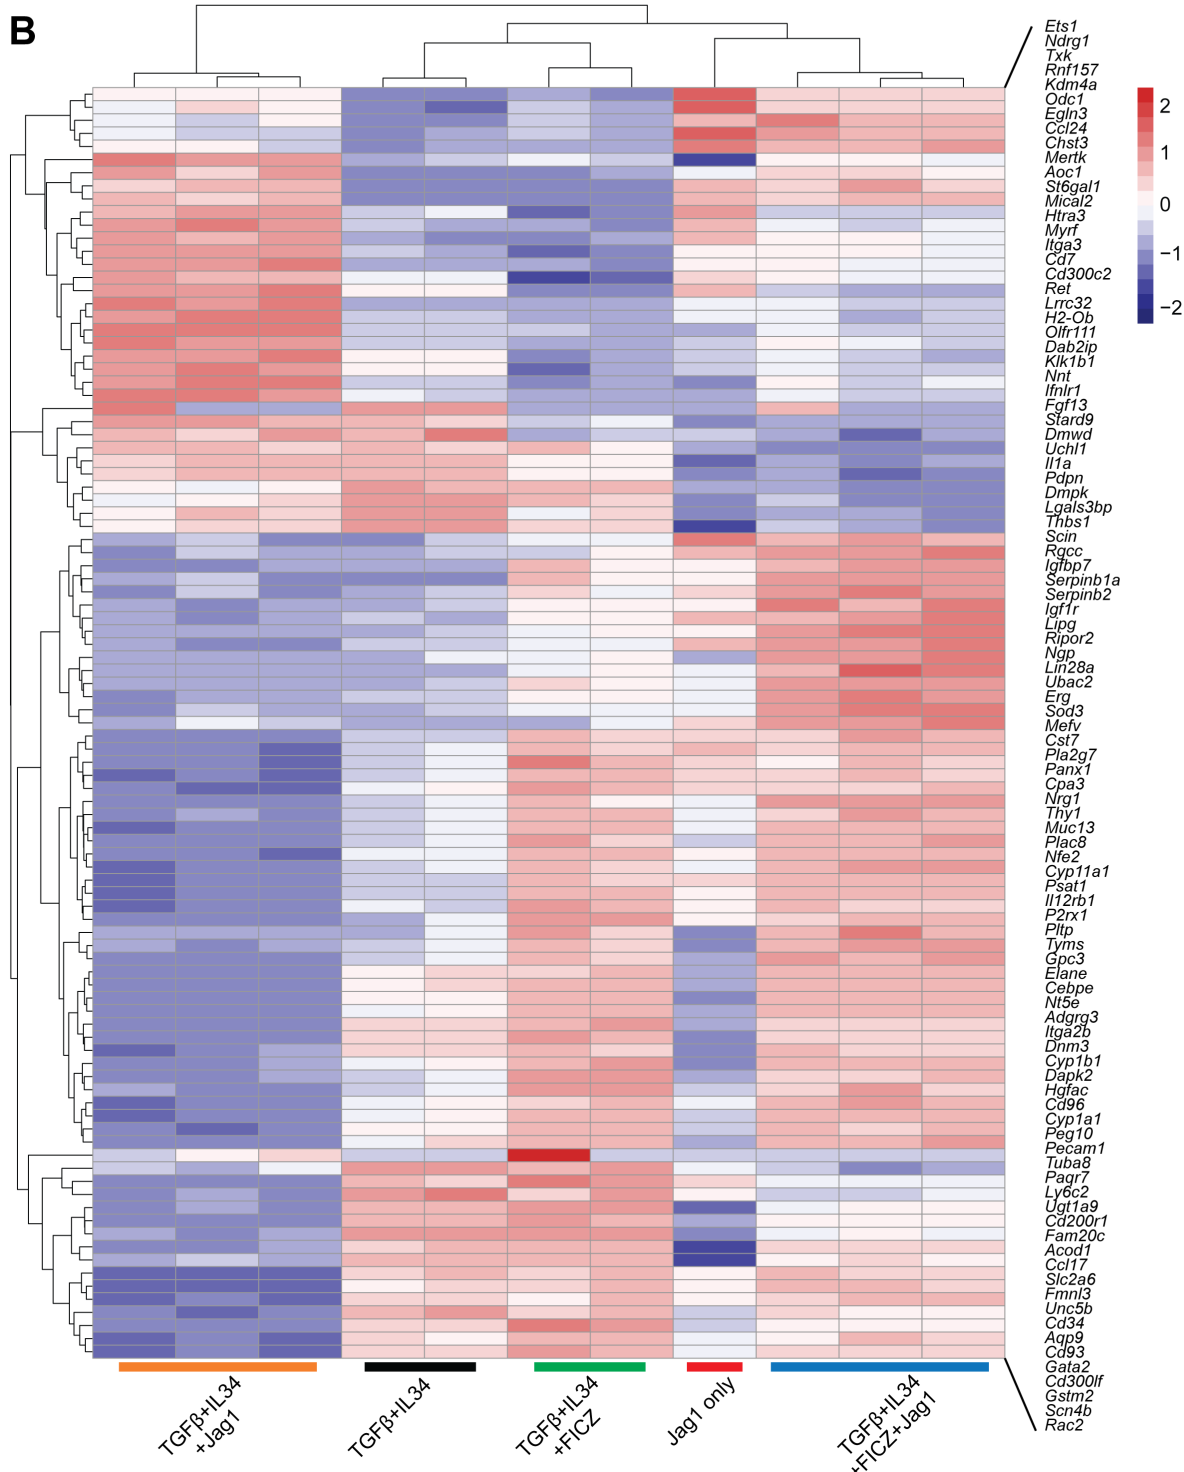

**Figure S7. Bulk RNA-seq of *in vitro*-generated mLCs, related to Figure 5. A.** Representative gating strategy for FACS isolation of CD11b<sup>int</sup>EpCAM<sup>+</sup> cells generated under conditions indicated in Figure 5C for bulk RNA-seq. **B.** Heatmap showing scaled expression of differentially expressed genes between the different indicated conditions.

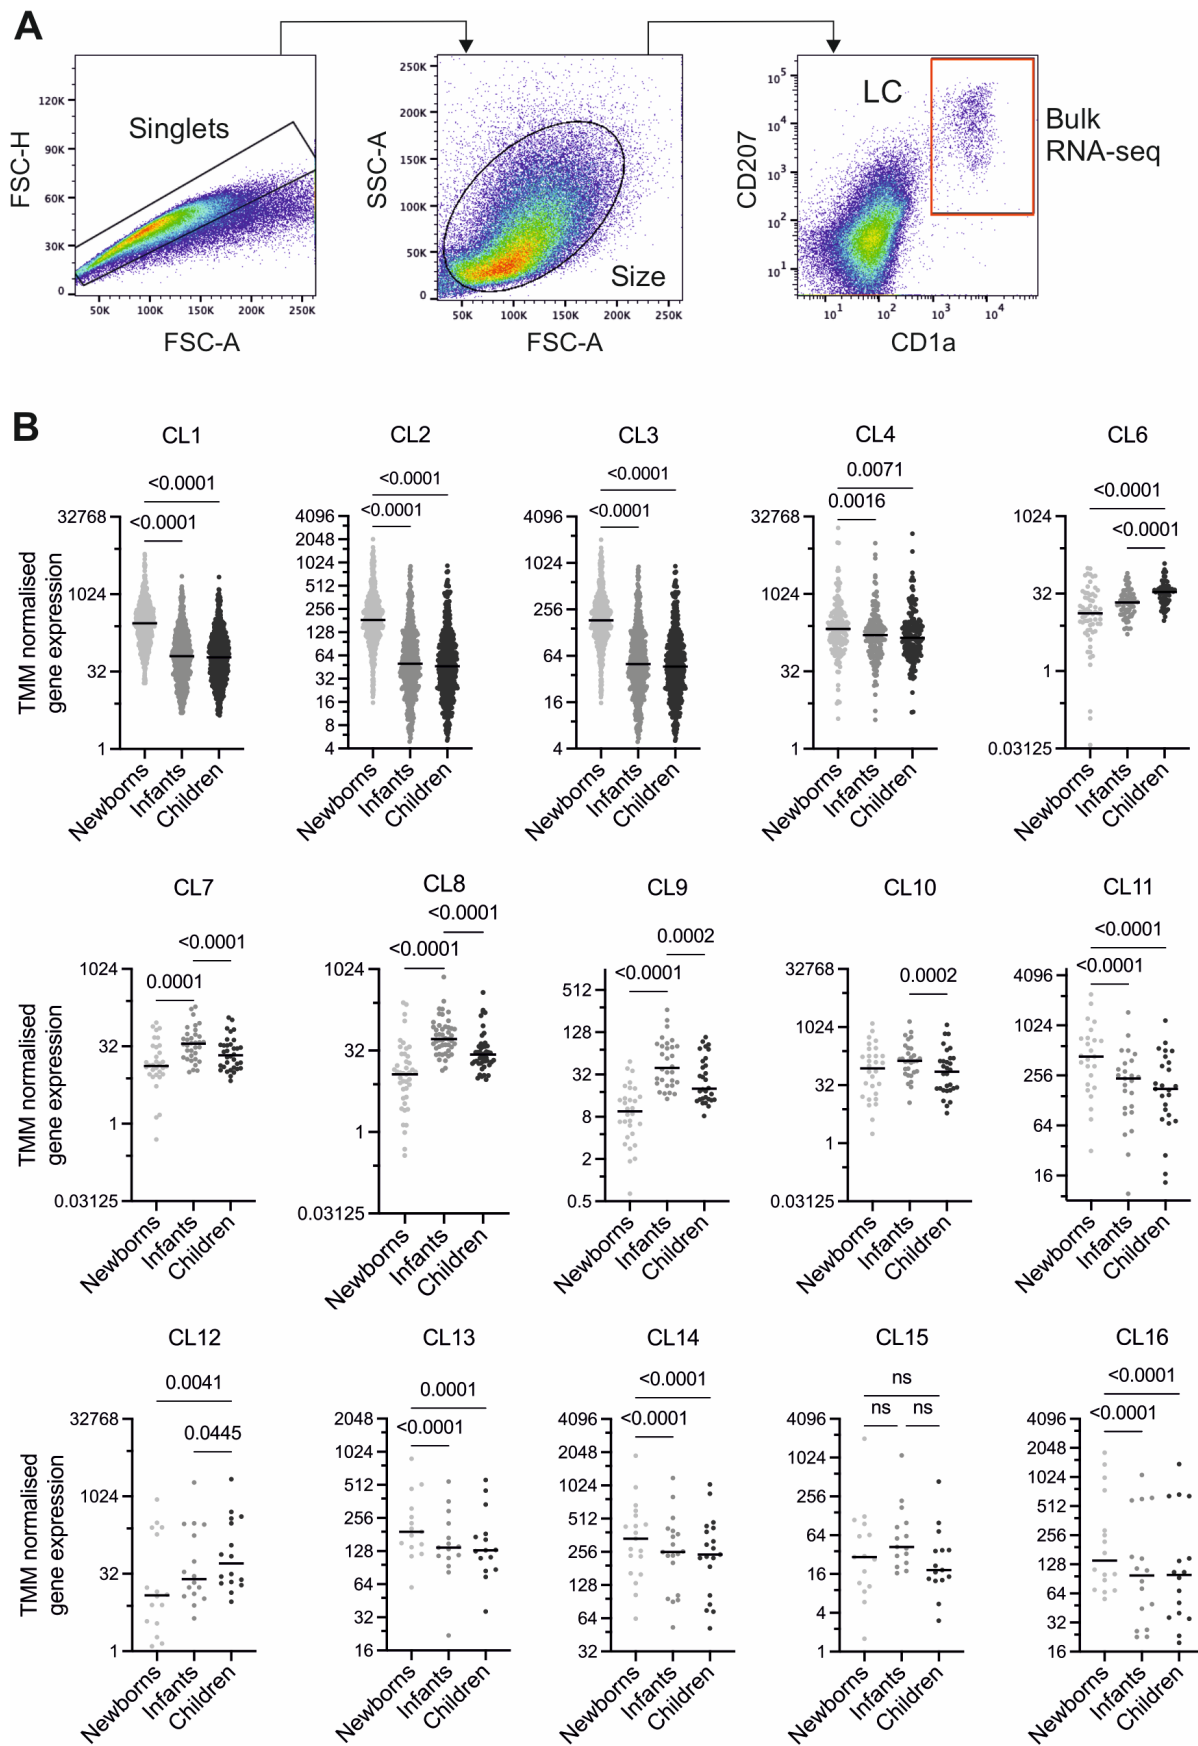

**Figure S8. Bulk RNA-seq of human LCs from newborns, infants and children, related to Figure 6. A.** Gating strategy for cell sorting of human epidermis samples for LC bulk RNA-seq. **B.** Average TMM normalised gene expression levels in graphia clusters across newborns, infants and children. Data are analyzed using a Two-way ANOVA with Tukey's post-hoc test.

| Antibody                                | Supplier                 | Catalog number | RRID        | Dilution |
|-----------------------------------------|--------------------------|----------------|-------------|----------|
| <b>Mouse</b>                            |                          |                |             |          |
| Anti-mouse CD3e APC (145-2C11)          | BioLegend                | 100312         | AB 312677   | 1:200    |
| Anti-mouse CD4 APC/Cy7 (GK1.5)          | BioLegend                | 100414         | AB 312699   | 1:200    |
| Anti-mouse CD4 PE (GK1.5)               | Thermo Fisher Scientific | 12-0041-82     | AB 465506   | 1:1000   |
| Anti-mouse CD4 PE/Cy7 (GK1.5)           | BioLegend                | 100422         | AB 312706   | 1:200    |
| Anti-mouse CD8a v450 (53-6.7)           | BD Biosciences           | 560469         | AB 1645281  | 1:100    |
| Anti-mouse CD8a PE (53-6.7)             | Thermo Fisher Scientific | 12-0081-83     | AB 465531   | 1:200    |
| Anti-mouse CD11b e450 (M1/70)           | Thermo Fisher Scientific | 48-0112-82     | AB 1582236  | 1:400    |
| Anti-mouse CD11b APC (M1/70)            | Thermo Fisher Scientific | 17-0112-83     | AB 469344   | 1:400    |
| Anti-mouse CD11b PE (M1/70)             | Thermo Fisher Scientific | 12-0112-82     | AB 2734869  | 1:400    |
| Anti-mouse CD11c FITC (HL3)             | BD Biosciences           | 553801         | AB 395060   | 1:50     |
| Anti-mouse CD11c APC (HL3)              | BD Biosciences           | 550261         | AB 398460   | 1:50     |
| Anti-mouse CD16/32 PE-Cy7 (93)          | BioLegend                | 101317         | AB 2104156  | 1:200    |
| Anti-mouse CD19 APC (1D3)               | Thermo Fisher Scientific | 17-0193-82     | AB 1659676  | 1:200    |
| Anti-mouse CD24 FITC (M1/69)            | BioLegend                | 101805         | AB 312839   | 1:500    |
| Anti-mouse CD24 BV650 (M1/69)           | BD Biosciences           | 563545         | AB 2738271  | 1:500    |
| Anti-mouse CD34 PE/Cy7 (SA376A4)        | BioLegend                | 152217         | AB 2910311  | 1:100    |
| Anti-mouse CD34 BV421 (SA376A4)         | BioLegend                | 152207         | AB 2650766  | 1:100    |
| Anti-mouse CD45 BV605 (30-F11)          | BioLegend                | 103155         | AB 2650656  | 1:200    |
| Anti-mouse CD45.1 BV605 (A20)           | BD Biosciences           | 563010         | AB 2737948  | 1:200    |
| Anti-mouse CD45.1 BV650 (A20)           | BioLegend                | 110736         | AB 11124743 | 1:200    |
| Anti-mouse CD45.2 PerCP/Cy5.5 (104)     | BD Biosciences           | 552950         | AB 394528   | 1:200    |
| Anti-mouse CD45.2 APC/Cy7 (104)         | BioLegend                | 109824         | AB 830788   | 1:200    |
| Anti-mouse CD49b APC (DX5)              | BioLegend                | 108910         | AB 313416   | 1:200    |
| Anti-mouse CD64 BV786 (X54-5/7.1)       | BD Biosciences           | 741024         | AB 2740644  | 1:100    |
| Anti-mouse CD115 BV605 (AFS98)          | BioLegend                | 135517         | AB 2562760  | 1:100    |
| Anti-mouse CD117 BV510 (2B8)            | BioLegend                | 105839         | AB 2629798  | 1:100    |
| Anti-mouse CD135 PE (A2F10.1)           | BioLegend                | 135306         | AB 1877217  | 1:50     |
| Anti-mouse CD206 BV711 (CO68C2)         | BioLegend                | 141727         | AB 2565822  | 1:100    |
| Anti-mouse CD207 PE/Dazzle 594 (4C7)    | BioLegend                | 144211         | AB 2876491  | 1:200    |
| Anti-mouse B220 BV786 (RA3-6B2)         | BD Biosciences           | 563894         | AB 2738472  | 1:500    |
| Anti-mouse B220 APC (RA3-6B2)           | BioLegend                | 103211         | AB 312997   | 1:500    |
| Anti-mouse EpCAM APC (G8.8)             | Thermo Fisher Scientific | 17-5791-82     | AB 2716944  | 1:400    |
| Anti-mouse EpCAM PerCP/e710 (G8.8)      | Thermo Fisher Scientific | 46-5791-82     | AB 10598205 | 1:400    |
| Anti-mouse Jagged-1 PE (HMJ1-29)        | BioLegend                | 130907         | AB 2561302  | 1:100    |
| Anti-mouse Jagged-2 PE (HMJ2-1)         | BioLegend                | 131007         | AB 2128358  | 1:100    |
| Anti-mouse Ly6C PE-Cy7 (AL-21)          | BD Biosciences           | 560593         | AB 1727557  | 1:200    |
| Anti-mouse Ly6C FITC (AL-21)            | BD Biosciences           | 553104         | AB 394628   | 1:200    |
| Anti-mouse Ly6G APC/Cy7 (1A8)           | BioLegend                | 127624         | AB 10640819 | 1:100    |
| Anti-mouse Ly6G APC (1A8)               | BioLegend                | 127613         | AB 1877163  | 1:100    |
| Anti-mouse MHCII BV510 (M5/114.15.2)    | BioLegend                | 107636         | AB 2561397  | 1:800    |
| Anti-mouse MHCII APC/e780 (M5/114.15.2) | Thermo Fisher Scientific | 47-5321-82     | AB 1548783  | 1:800    |
| Anti-mouse MHCII A700 (M5/114.15.2)     | BioLegend                | 107621         | AB 493727   | 1:400    |
| Anti-mouse Sca-1 BV711 (D7)             | BioLegend                | 108131         | AB 2562241  | 1:100    |
| Anti-mouse TER-119 APC (TER-119)        | BioLegend                | 116212         | AB 313713   | 1:200    |
| Anti-mouse Vβ8.3 TCR FITC (1B3.3)       | BD Biosciences           | 553663         | AB 394979   | 1:100    |
| Anti-mouse Vβ8.3 TCR PE (1B3.3)         | BD Biosciences           | 553664         | AB 394980   | 1:400    |
| <b>Human</b>                            |                          |                |             |          |
| Anti-human CD207-PeVio700 (REA822)      | Miltenyi Biotec          | 130-112-370    | AB 2656213  | 1:100    |
| Anti-human CD11a-VioBlue (REA736)       | Miltenyi Biotec          | 130-111-875    | AB 2889493  | 1:50     |
| Anti human HLA-DR-VioGreen (REA805)     | Miltenyi Biotec          | 130-111-795    | AB 2652156  | 1:100    |

**Table S1.** List of flow cytometry antibodies used in this study.

| <b>Antibody</b>                      | <b>Supplier</b> | <b>Catalog number</b> | <b>RRID</b> | <b>Dilution</b> |
|--------------------------------------|-----------------|-----------------------|-------------|-----------------|
| Anti-CD11b (M1/70)                   | Abcam           | ab8878                | AB_306831   | 1:200           |
| Anti-MHCII (ER-TR3)                  | Abcam           | ab15630               | AB_302007   | 1:200           |
| Anti-mouse I-A/I-E-488 (M5/114.15.2) | BioLegend       | 107615                | AB_493524   | 1:200           |
| Anti-mouse EpCAM-595 (G8.8)          | BioLegend       | 118222                | AB_2563322  | 1:400           |
| Anti-KRT14 (polyclonal)              | Convance        | PRB-115P              | AB_292096   | 1:500           |

**Table S2.** List of primary antibodies used for confocal microscopy in this study.
